# Supplementary material for: Methane emissions from a sediment-deposited island in a Lancang-Mekong reservoir
Source: Copernicus journal article supplement (doi:10.5194/bg-2018-380), 2018-09-13
Supplement: Supplementary file 1 [file bg-2018-380-supplement.pdf]

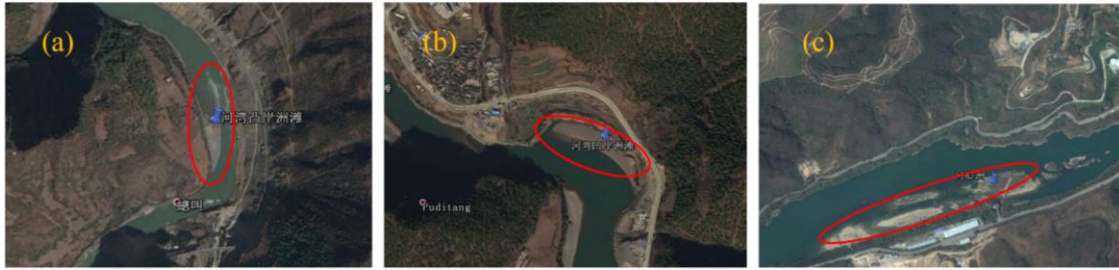

**Fig. S1** The river impoundment formed islands in the Lancang-Mekong River. There were about 50 sediment-deposited islands, of which 54.2%, 12.5% and 33.3% were located at the convex bank (a), the concave bank (b), and the channel (c), respectively.

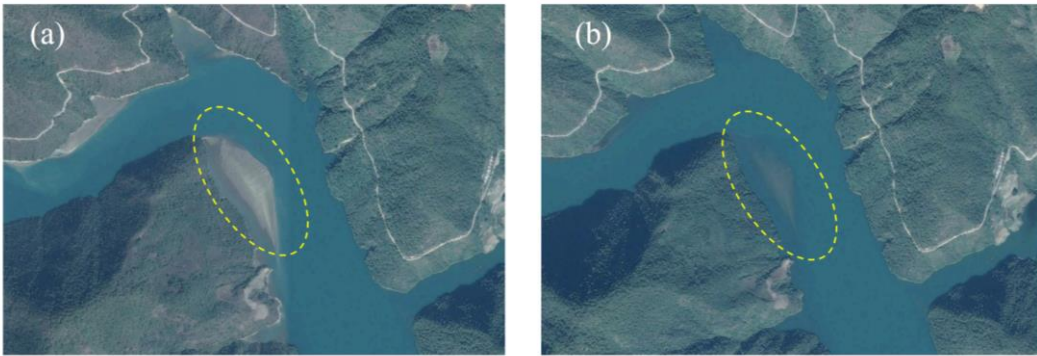

**Fig. S2** Island image before (a) and after (b) flooding under reservoir operation.

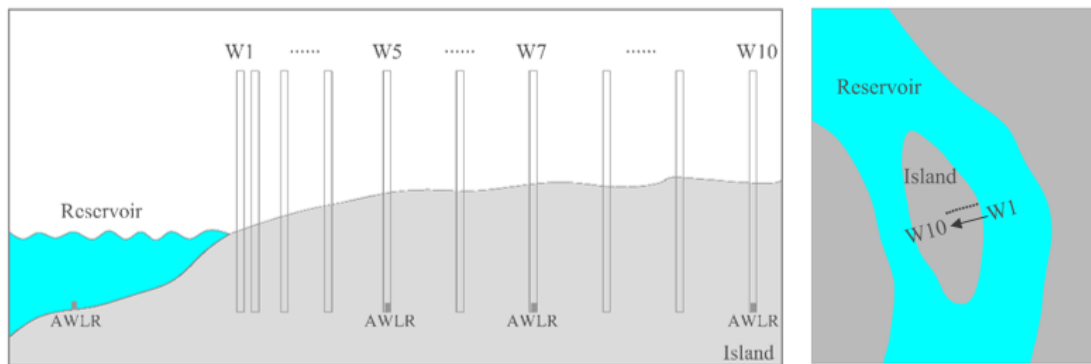

**Fig. S3** Monitoring wells established from the island edge to the center.

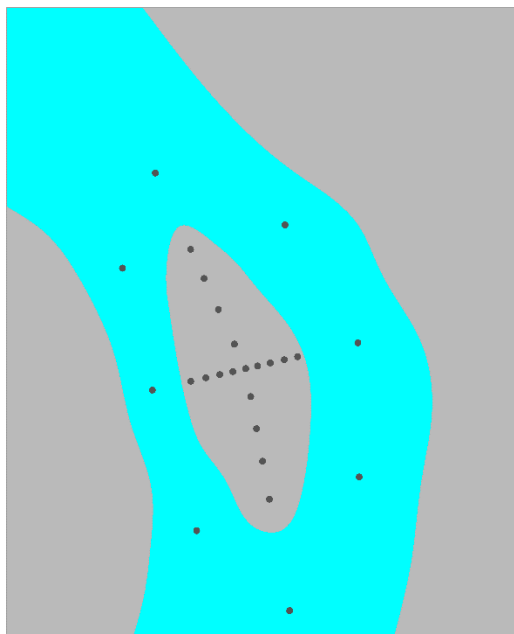

**Fig. S4** Sampling sites for methane flux analyses in the island and reservoir. Solid black circles represent sampling sites.

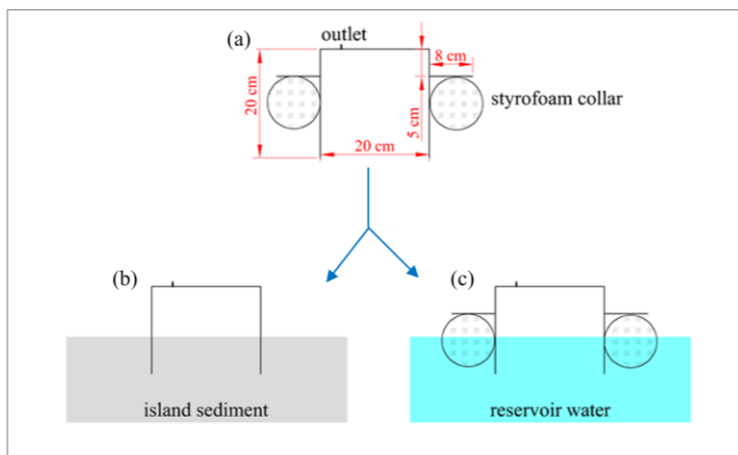

**Fig. S5** Bifunctional static chambers (a) for methane flux analyses across the sediment-air interface in the island (b) and water-air interface in the reservoir (c). Styrofoam collar was removable.

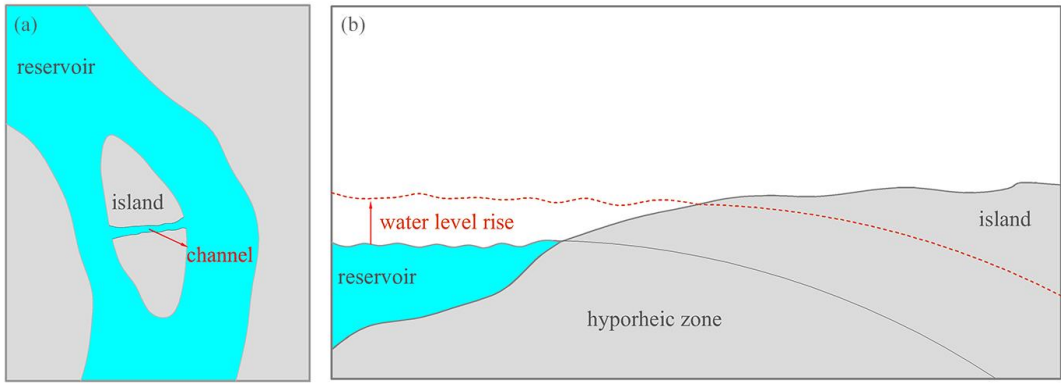

**Fig. S6** Strategy for the removal of a methane emission hotspot at the island center. (a) Artificial channel; (b) Rising water level in the reservoir.

**Table S1** The main features of cascade reservoirs in the Lancang-Mekong River, China

|                                            | Miaowei | Gongguoqiao | Xiaowan | Manwan | Dachaoshan | Nuozhadu | Jinghong |
|--------------------------------------------|---------|-------------|---------|--------|------------|----------|----------|
| Dam height (m)                             | 139.8   | 105         | 292     | 132    | 115        | 261.5    | 108      |
| Water level (m)                            | 1408    | 1307        | 1240    | 994    | 899        | 812      | 602      |
| Storage capacity ( $10^8$ m <sup>3</sup> ) | 6.6     | 3.5         | 149.1   | 5.0    | 9.4        | 237.0    | 11.4     |
| Installed capacity ( $10^6$ kW)            | 1.4     | 0.90        | 4.20    | 1.50   | 1.35       | 5.85     | 1.75     |
| Hydrological residence time (a)            | –       | 0.01        | 2.36    | 0.78   | 0.30       | 1.87     | 0.40     |

“–” means the unknown data
