# Supplementary material for: Methane emissions from a sediment-deposited island in a Lancang-Mekong reservoir
Source: Copernicus journal article supplement (doi:10.5194/bg-2018-380), 2018-09-13
Supplement: Supplementary file [file bg-2018-380-AC4-supplement.pdf]

1 **Methane emissions from a sediment-deposited island in a Lancang-Mekong**  
2 **reservoir: Spatial heterogeneity and mechanisms**

3 Wenqing Shi<sup>1,2</sup>, Qiuwen Chen<sup>1,2</sup>, Jianyun Zhang<sup>1,3</sup>, Cheng, Chen<sup>2</sup>, Yuchen Chen<sup>2</sup>, Yuyu  
4 Ji<sup>2,4</sup>, Juhua Yu<sup>1,2</sup>, Bryce R. Van Dam<sup>5</sup>

5 <sup>1</sup>State Key Laboratory of Hydrology-Water Resources & Hydraulic Engineering,  
6 Nanjing Hydraulic Research Institute, China

7 <sup>2</sup>Center for Eco-Environment Research, Nanjing Hydraulic Research Institute, China

8 <sup>3</sup>Research Center for Climate Change, Ministry of Water Resources, China

9 <sup>4</sup>College of Water Conservancy and Hydropower Engineering, Hohai University, China

10 <sup>5</sup>Institute of Marine Sciences, University of North Carolina at Chapel Hill, USA

11 Correspondence to: Qiuwen Chen ([qwchen@nhri.cn](mailto:qwchen@nhri.cn))

## Abstract

In dammed rivers, sediment accumulation creates potential methane emission hotspots, which have been extensively studied in forebays. However, methane emissions from sidebays remain poorly understood. We investigated methane emissions from a sediment-deposited island situated in the sidebay of the Manwan Reservoir, Lancang-Mekong River. High methane emissions (maximum  $10.4 \text{ mg h}^{-1}\text{m}^{-2}$ ) were observed at the island center, while a ring-like zone of low-to-negative methane emission was discovered at the drawdown area around the island edge, whose flux varied between  $-0.2$ – $1.6 \text{ mg h}^{-1}\text{m}^{-2}$ . The ring-like zone accounted for 89.1 % of the island area, of which 9.1 % was a methane sink zone. Microbial processes in the drawdown area, regulated by hydrological variations, were responsible for the low methane flux in this area. Under reservoir operation, frequent water level fluctuations enhanced hyporheic exchange and created oxygen gradients along the hyporheic flow path. Dissolved oxygen in hyporheic water decreased from  $4.80 \text{ mg L}^{-1}$  at the island bank edge to  $0.43 \text{ mg L}^{-1}$  at the center, which in turn decreased methanogen abundance for methane production and increased methanotroph abundance for methane oxidation at the ring-like zone. This study quantified the methane emissions from sediment deposited islands in the reservoir and helps to evaluate the global warming effects of hydropower systems.

## 1 Introduction

Natural rivers form continuous ecosystems, in which physical and chemical factors drive biological processes from headwaters to river deltas (Butman and Raymond, 2011; Wilkinson et al., 2015). Along this continuum, rivers receive terrestrial organic carbon (OC) and deliver it to the ocean at a global average rate of approximately 400–900 Tg OC per year (Butturini et al., 2016; Seitzinger et al., 2005; Ran et al., 2013). In the past two decades, many rivers have become intensively regulated by dams for a variety of purposes, including improved navigation, water supply, flood control, and hydropower production (Maavara et al., 2015). These engineering works decrease water velocity, converting rivers into a series of lentic reservoirs, where sediment accumulates in forebays and sidebay islands (Maeck et al., 2013). Globally, the sediment accumulation process has reduced the river-to-ocean flux of terrestrial OC by 26 % (Syvitski et al., 2005).

Methane is the second most important greenhouse gas, contributing approximately 18 % to total global warming effects (Smith et al., 2013; Wuebbles and Hayhoe, 2002). Inland waters (lakes, rivers, and reservoirs) are significant sources of atmospheric methane, which is mainly released from anoxic sediment (Bastviken et al., 2011; Sobek et al., 2012). After river damming, settling particles aggregate to form cohesive sediment layers, which often become anoxic after oxygen is consumed but not replenished through diffusive exchange (Rubol et al., 2013; Maeck et al., 2013). Subsequently, large amounts of methane may be produced and released into the atmosphere (Thornton et al., 1990; Maeck et al., 2013; Wilkinson et al., 2015), thereby

reducing the green credentials of hydropower. This issue has received considerable attention in dammed rivers (Giles, 2006; Hu and Cheng, 2013). Maeck et al. (2013) identified reservoirs as methane emission hotspots by comparing reservoir and riverine reaches, and estimated that global methane emissions have increased by 7 % due to sedimentation in dammed rivers. In sidebays, the deposited sediments often created the drawdown area under water level fluctuations, where water, heat, nutrients and chemicals are exchanged and many biogeochemical reactions preferentially occur (Tonina and Buffington, 2011; Cardenas and Markowski, 2010), potentially emitting large amounts of greenhouse gases. Previous studies have mainly focused on methane emissions from dam forebays (Yang et al., 2013; DelSontro et al., 2010; DelSontro et al., 2011), while the understandings of methane emissions from sediments deposited in sidebays remain poor.

In reservoirs, the water level decreases during hydropower production, and increases with the inputs from inflows during the stagnant hydropower production. As a result, the water level frequently fluctuates following hydropower production demands, which enhances hyporheic exchange by driving water flow in and out of the drawdown area (Tonina and Buffington, 2011; Hucks Sawyer et al., 2009). This may lead to changes of oxygen conditions in the interior of the drawdown area. Zarnetske found a redox gradient along the hyporheic flow paths in a third-order stream in the Willamette River basin, USA (Zarnetske et al., 2011a). Methane from sediments is mainly produced by methanogens, and is consumed by methanotrophs (Borrel et al., 2011). Methanogens and methanotrophs belong to anaerobic and aerobic microbes, respectively (Nazaries et

al., 2013). The oxygen conditions in sediments have been found to manipulate these microbial processes and methane emission (Chamberlain et al., 2016; Shi et al., 2018). Hence, we suppose the changes of oxygen conditions in sediments may alter methane emission scheme on sediment-deposited islands in reservoir sidebays.

In this study, methane emissions from a sediment-deposited island were investigated in the sidebay of Manwan Reservoir, Lancang-Mekong River. Monitoring wells were established to probe hyporheic exchange and oxygen gradients across the island. Methanogen and methanotroph abundances in the sediment were analyzed using quantitative polymerase chain reaction (qPCR) to reveal the associated molecular mechanism. The objective of this study was to explore methane emission patterns from sediment-deposited zones in the reservoir sidebay and the underlying mechanisms.

## 2 Methods

### 2.1 Study area

The Lancang-Mekong River is a trans-boundary river in Southeast Asia and the tenth-largest river in the world, which originates from the Tibetan Plateau in China, continues into Myanmar, Lao PDR, Thailand, Cambodia and Viet Nam, and discharges into the South China Sea. It has a length of approximately 4909 km, a total watershed area of 795,000 km<sup>2</sup> (Mekong River Commission, 2018). Due to rich hydropower resources, cascade dams have been built on the mainstream of the Lancang-Mekong River. After impoundment, about 33 sediment-deposited islands of  $4.3 \times 10^5$  m<sup>2</sup> formed in the reservoir sidebay in the upstream section of the Lancang-Mekong River in China, of

which 81.8% are located at the convex bank, and 18.2% at the concave bank (Fig. S1). This study selected the widely distributed type of island at the convex bank for investigation, which is located in the Manwan Reservoir (24°43'44" N, 100°23'5" E). The studied island has an oval shape with a surface area of  $1.3 \times 10^4 \text{ m}^2$  (Fig. 1). Manwan dam is the first-built one (completed in 1993) in the upstream section of the Lancang-Mekong River in China, with a height of 132 m. The Manwan Reservoir has a normal water level of 994 m, a total storage capacity of  $5.0 \times 10^8 \text{ m}^3$ , an installed capacity of  $1.5 \times 10^6 \text{ kW}$  and hydrological residence time of 0.78 a. Manwan has a subtropical plateau monsoon climate, and the temperature features no distinct seasons. Under water level fluctuation induced by reservoir operation, the island bank is frequently flooded (Fig. S2).

## 2.2 Monitoring wells

Ten monitoring wells were installed in the island bank at 0.5 (W1), 1.5 (W2), 3.5 (W3), 6.5 (W4), 10.5 (W5), 15.5 (W6) 20.5 (W7), 25.5 (W8), 30.5 (W9), and 35.5 m (W10) from the waterline, respectively (Fig. S2). The wells were 90-mm diameter perforated polyvinylchloride pipes, reaching a depth of 2.0 m below the ground surface. To prevent flooding, the wells were extended 2.0 m aboveground. Due to hydropower production, the reservoir runs in a pseudo-periodic hydrological regime with cyclic water level fluctuations. Here, we monitored a complete cycle of water level fluctuation within 115 h. Water levels were measured every 10 min from 11 to 16 September 2016 using automated water level recorders (U2000101, OneSetHoBo, USA), which were mounted at the bottom of W5, W7, W10, and the reservoir (Fig. S3).

Instantaneous lateral fluid fluxes ( $q$ ) across the island bank per unit length were calculated following the Darcy Eq. (1) (Gerecht et al., 2011; Hucks Sawyer et al., 2009):

$$q(t) = -Kb \cdot \left[ \frac{\partial h(x,t)}{\partial x} \right] \quad (1)$$

where  $Kb$  is sediment transmissivity,  $\text{m d}^{-1}$ ;  $h$  is hydraulic head,  $\text{m}$ ;  $x$  is distance,  $\text{m}$ ; and  $t$  is time,  $\text{d}$ . A positive  $q$  value indicates flow from the reservoir to the island. The island  $Kb$  was  $0.99 \text{ m d}^{-1}$ , which was measured according to Philip (1993).

### 2.3 Sampling and physicochemical analysis

After water level receded at the monitoring time of 100 h, groundwater (100 ml) was carefully sampled in triplicate from each monitoring well with a portable peristaltic pump (SC-1/253Yx, Chongqing Jieheng Peristaltic Pump Co., Ltd., China), and then filtered *in situ* using portable syringe filters for water DOC analysis. Sediment (5 g) was synchronously collected in triplicate from 10 cm below the surface adjacent to each well (Fig. 1b) using a hand shovel, and then quickly homogenized before the storage in the plastic ziplock bag for the analyses of sediment OC and microbe. At a reservoir site adjacent to W1, water and surface sediment samples were also collected in triplicate using a stainless-steel bucket and an Ekman grab sampler, respectively. The collected water and sediment samples were kept frozen in an ice box ( $-5 \text{ }^{\circ}\text{C}$ – $10 \text{ }^{\circ}\text{C}$ ) and transported to the laboratory for analysis within three days.

Dissolved oxygen (DO) in the reservoir was measured using a multi-sensor probe (YSI 6600, Yellow Springs Instruments, USA), and the DO at each well was measured *in situ* using a DO meter (JPB-607A, Shanghai INESA Scientific Instrument Co. Ltd., China) by directly placing the probe in the well. Analysis of dissolved organic carbon

(DOC) in the water was conducted on filtered samples (Whatman GF/F, UK) using a total organic carbon analyzer (Liqui TOC II, Elementar Inc., Germany). Sediment OC was determined using a vario MACRO cube elementar (Elementar Inc., Germany). Fresh sediment was freeze-dried and ground before analysis. Approximately 30 mg of each sample was weighed in a tin cup and acidified with two drops of 8 %  $\text{H}_3\text{PO}_4$  to remove inorganic carbonates before OC analysis.

## 2.4 Methane flux analysis

Methane fluxes from the reservoir (eight sampling sites) and island (seventeen sampling sites) were analyzed using the static chamber method (Duchemin et al., 1999). The static chamber method has been widely used in the analyses of methane fluxes from air-soil/water interfaces, including the low-to-negative methane flux analyses (Veldkamp et al., 2013; Wang et al., 2013). The sampling sites are shown in Fig. 1b and Fig. S4. The plexiglass chamber consisted of a 6.28-L cylinder (20 cm in diameter, 20 cm in height) and a removable Styrofoam collar, and was covered with Mylar paper to prevent temperature rise inside the chamber when exposed to the sun. During gas collection in the reservoir, the chamber was fitted with the Styrofoam collar, which maintained the upper closed portion of the chamber about 10 cm above the water surface (Fig. S5). The outlet of the chamber was open during the chamber deployment, and was left to stand for 20 min to equilibrate with ambient pressure outside before sample collection. During gas collection on the island, the chamber was carefully inserted 5 cm deep into the sediment according to (Smith et al., 2000), leaving 15 cm above the sediment surface. The outlet of the chamber was also open during the



chamber deployment, and was left to stand for 90 min to equilibrate before sample collection. Gas samples (20 ml) were collected every 10 min over a 40-min period using a 25-ml polypropylene syringe and injected into a 12-ml pre-evacuated Exetainer® vial (839 W, Labco, UK) with double wadded septa caps for storage until analysis using a gas chromatograph (7890B, Agilent Technologies, USA). Exetainer® vials have been evaluated for storage of gas samples and they can limit sample loss to insignificant amounts for at least 3 months (Glatzel and Well, 2008; Van Dam et al., 2018). Gas fluxes were calculated using linear regression based on the concentration changes of five samples over time. Linear regression correlation coefficients of less than 0.95 were not accepted for further calculations (Duchemin et al., 1999). Methane fluxes at each site were measured in triplicate by placing three individual chambers. Simple spline interpolation was used to interpolate the methane emissions from the sampling sites into space in the reservoir and island separately (Immerzeel et al., 2009), and the range of the uncertain was  $0.05 \text{ mg h}^{-1} \text{ m}^{-2}$ . Methane emission areas at eight different categories were also calculated in the island.

## **2.5 Microbial abundance analysis**

After being transported to the laboratory, the frozen sediment samples were stored immediately at  $-80 \text{ }^{\circ}\text{C}$  for further molecular analysis. The sediment methanogens and methanotrophs adjacent to each monitoring well across the island (ten sediment samples) were quantified using qPCR. DNA extraction was undertaken using a FastDNA Power-Max Soil DNA Isolation Kit (MP Biomedical, USA) according to the manufacturer's instructions. The qPCR assay was performed using primers targeting methanogenic

archaeal 16S rDNA (primer set, 1106F/1378R) and methanotrophic *pmoA* genes (primer set, A189F/M661R) (Watanabe et al., 2007; Ma and Lu, 2011). Gene copies were amplified and quantified in a Bio-Rad cycler equipped with the iQ5 real-time fluorescence detection system and software (version 2.0, Bio-Rad, USA). All reactions were completed in a total volume of 20  $\mu$ L containing 10  $\mu$ L SYBR<sup>®</sup> *Premix Ex Taq*<sup>™</sup> (Toyobo, Japan), 0.5 mM of each primer, 0.8  $\mu$ L of BSA (3 mg mL<sup>-1</sup>, Sigma, USA), ddH<sub>2</sub>O, and template DNA. The qPCR program mainly depends on the sequence and length of functional genes and primers used, and different qPCR programs for archaeal 16S rDNA and *pomA* were applied in this study. The qPCR program for archaeal 16S rDNA was as follows: 95 °C for 60 s, followed by 40 cycles of 95 °C for 25 s, 57 °C for 30 s, and 72 °C for 60 s, and the qPCR program for *pomA* referred to: 95 °C for 60 s, followed by 40 cycles of 95 °C for 25 s, 53 °C for 30 s, and 72 °C for 60 s. A standard curve was established by serial dilution (10<sup>-2</sup>–10<sup>-8</sup>) of known concentration plasmid DNA with the target fragment. All PCRs were run in triplicate on 96-well plates (Bio-Rad, USA) sealed with optical-quality sealing tape (Bio-Rad, USA). Three negative controls without the DNA template were included for each PCR run.

## 2.6 Data analysis

One-way analysis of variance (ANOVA) was employed to test the statistical significance of differences between sampling sites. Post-hoc multiple comparisons of treatment means were performed using the Tukey's least significant difference procedure. All statistical calculations were performed using the SPSS (v22.0) statistical package for personal computers. The level of significance was  $P < 0.05$  for all tests.

## 3 Results

### 3.1 Physicochemical characteristics

As shown in Fig. 2, the island groundwater had lower DO but higher DOC, compared with that of the bulk reservoir water. Lateral gradients of groundwater DO and DOC were observed in the island. From the island edge to the center, DO and DOC decreased significantly from  $50.7 \pm 2.0$  to  $4.5 \pm 0.9\%$  and  $7.30 \pm 0.54$  to  $1.70 \pm 0.39$  mg L<sup>-1</sup>, respectively ( $P < 0.05$ ) (Fig. 2a,b). In general, sediment OC was higher near the island edge, decreasing from  $6.37 \pm 0.69$  mg g<sup>-1</sup> at the edge to  $2.42 \pm 0.60$  mg g<sup>-1</sup> at the center of the island. Sediment OC in the reservoir was  $6.63 \pm 0.09$  mg g<sup>-1</sup> (Fig. 2c).

### 3.2 Water level fluctuation and hyporheic exchange

The reservoir stage fluctuated frequently during the field survey, showing three distinct peaks, with a maximum of 3.80 m in the first 37 h and gradual decline to below 1.30 m in the next 60 h, yielding a maximum oscillation of 2.54 m. Similar oscillations were observed in the island water table, but were damped and lagged relatively to the reservoir stage fluctuations (Fig. 3a). In W5, W7, and W10, the water levels reached 3.27, 3.41, and 3.33 m, then fell to 1.74, 2.09, and 2.01 m, for a maximum oscillation of 1.53, 1.33, and 1.32 m, respectively. Data from the automated water level recorders indicated that the water level responses in W5, W7, and W10 lagged the reservoir stage by 20, 25, and 30 min, respectively. Lateral hyporheic exchanges across the island bank were calculated according to the Darcy Law, showing that the flux was largest at the island edge and decreased from the edge to the center. The water exchange across the 0–10.5 m island edge zone was 1.2 and 4.7 times higher than those across the 10.5–20.5

m and 20.5–35.5 m zones, respectively. The flow rates at the reservoir-W5, W5-W7, and W7-W10 zones were relatively consistent at -0.55–1.35, -0.89–0.28, and -0.39–0.17 m<sup>2</sup> d<sup>-1</sup> (Fig. 3b), resulting in a water exchange volume of 2.61, 2.26, and 0.56 m<sup>3</sup>, respectively, over the 115-h observation period.

### 3.3 Methane emissions

High methane emission rates were observed at the island center, with a maximum of 10.4 mg h<sup>-1</sup>m<sup>-2</sup>. However, a ring-like zone of low-to-negative methane emission appeared at the drawdown area around the island edge, where the methane flux was maintained at -0.2–1.6 mg h<sup>-1</sup>m<sup>-2</sup> (Fig. 4a). The negative flux values also suggest the occurrence of a methane sink at the island edge. The ring-like zone accounted for 89.1 % of the island area, of which 9.1 % accounted for the methane sink zone (Fig. 4b). Methane emissions were estimated to 8.3 and 5.4 g h<sup>-1</sup> in total from the island center and the ring-like zone, accounting for 60.6% and 39.4%, respectively. Compared with the island, the methane flux from the adjacent reservoir was moderate at 0.4–5.5 mg h<sup>-1</sup>m<sup>-2</sup> (Fig. 4a).

### 3.4 Methanogen and methanotroph abundances

Methanogens and methanotrophs were distributed non-uniformly across the island. In general, methanogen counts were low at the island edge but high at the center, whereas methanotrophs were abundant at the island edge but scarce in the center. From the island edge to the center, the methanogenic archaeal 16S rDNA gene increased from 0.12 × 10<sup>5</sup> to 5.34 × 10<sup>5</sup> copies g<sup>-1</sup>, and the methanotrophic *pmoA* gene decreased from 1.57 × 10<sup>6</sup> to 0.64 × 10<sup>6</sup> copies g<sup>-1</sup> (Fig. 5a). The ratio of methanogen to methanotroph

abundance increased from 0.01 at the island edge to 0.83 at the center (Fig. 5b).

## **4 Discussion**

### **4.1 Hyporheic exchange and oxygen gradients**

In hydropower reservoirs, the release of water pulses is often employed to increase power production and meet daily electricity peak demand (Bonalmi et al., 2012; Toffolon et al., 2010). Such hydropeaking creates daily water level fluctuations in the reservoir. In this study, frequent water level fluctuations were observed within the 115-h observation period, with a maximum of 3.80 m (Fig. 3a). **In presence of head gradients and sediment resistance (Gerecht et al., 2011)**, a hysteretic response occurred in the island bank water table (Fig. 3a), driving water exchange between the reservoir and island (Fig. 3b). The water exchange flux was largest close to the island edge and decreased from the edge to the center, as water table fluctuations were attenuated (Fig. 3a).

During a storage-release cycle, the island switched from water gaining to losing at daily or hourly scales, creating a ring-like drawdown area of enhanced hyporheic exchange around the island. The drawdown area extended tens of meters into the island bank (Fig. 3b). If the river system was unregulated, however, hydrodynamics within the drawdown area would likely exhibit seasonal or annual patterns, or keep pace with snowmelt and rainstorm events, under a natural base flow-fed regime. In this case, the drawdown area may be limited or altogether absent (Boano et al., 2008; Cardenas and Wilson, 2007).

Exchange across the sediment-water interface involves mixing of surface water and groundwater through hyporheic flow (Hester et al., 2013; Naranjo et al., 2015). In this study, when the reservoir water entered the hyporheic flow path, it was typically rich in oxygen (Fig. 2d). As oxygen was consumed through aerobic respiration, other terminal electron acceptors were utilized (Klupfel et al., 2014), creating an oxygen gradient along the hyporheic flow path (Fig. 2d). This caused the spatial heterogeneity of the abundances of oxygen-sensitive methanogens and methanotrophs across the island. The oxygen-rich environment at the island edge favored methanotroph growth and inhibited methanogen growth, while the oxygen-poor environment at the island center inhibited methanotroph growth and favored methanogen growth. As a result, we detected low methanogen abundance at the island edge, but high abundance at the center, with methanotrophs showing the opposite pattern (Fig. 5).

#### **4.2 Spatial heterogeneity of methane emissions**

In dammed rivers, riverbed sediment accumulation creates potential methane emission hotspots. In this study, however, high methane emissions were only observed at the island center, with a ring-like low methane emission zone or even methane sink appearing around the island edge (Fig. 4a). This was attributed to the spatial heterogeneity of methanogens and methanotrophs across the island (Fig. 5), leading to an increase in methane production and a decrease in methane consumption from the island edge to the center. The methane sink at the island edge (Fig. 4) was mainly attributed to the strong oxidation by methanotrophs, which may consume methane to below equilibrium with the atmosphere. Methane emissions may not only rely on

bacterial abundance but also bacterial activity (Schwarz et al., 2008). This deserves further studies using other molecular biology techniques, such as DNA/RNA-based stable isotope probing (Dumont and Murrell, 2005). In addition, groundwater DOC and sediment OC at the island edge, which are carbon sources for methane emission, were higher than that at the island center (Fig. 2b,c), suggesting that both sediment heterogeneity and dilution effects of hyporheic exchange had limited contribution to the spatial pattern of methane emissions in the island.

### 4.3 Implications

Greenhouse gas emissions significantly detract from the green credentials of hydropower, and have thus received considerable research attention (Giles, 2006; Hu and Cheng, 2013). Previous studies have revealed that damming causes significant retention of carbon and creates deep, anoxic sediment strata, fueling methanogenesis and net water-air methane flux (Maeck et al., 2013). This study demonstrated that methane emissions at the most area of the sediment-deposited island were generally lower than the adjacent reservoir **under water level fluctuation induced by reservoir operation** (Fig. 4a), but higher than the drawdown area at other reservoir bank (**-0.08–0.66 mg h<sup>-1</sup>m<sup>-2</sup>**), such as Three Gorge Reservoir (Chen et al., 2011). This was mainly due to the deep sediment strata (about 60 m in depth) in the island. Given the widely distributed sediment-deposited islands in reservoirs, it should be of concern in future estimations of greenhouse gas emissions from dammed rivers.

Until now, few studies have concentrated on organic carbon mineralization in the drawdown area in reservoirs, with most focusing on the process of denitrification

(Zarnetske et al., 2011b). Carbon emissions in the drawdown area are poorly understood, especially in regulated and dammed rivers. This study fills the knowledge gap and adds to our understanding of the ecological impacts of hydropower exploitation. Under water level fluctuation induced by reservoir operation, variable oxygen conditions and methane production may also affect the mercury cycle in the drawdown area and thereby the release of methylmercury (a bioaccumulative environmental toxicant) to the river (Marvin-DiPasquale et al., 2009), a subject deserving of further study.

## 5 Conclusions

In dammed rivers, sediment deposited islands are widely distributed in sidebays and are potential hotspots of methane emission to the atmosphere. In this study, high methane fluxes were only observed at the island center, while a ring-like zone of low methane emission or even sink was found in the drawdown area around the island edge. We attribute this spatial heterogeneity of methane emissions to hyporheic exchange between the reservoir and island. Under reservoir operation, frequent water level fluctuations drove hyporheic exchange, creating oxygen gradients along the hyporheic flowpath. These oxygen gradients affected the microbial communities associated with methane production and consumption, producing the spatial heterogeneity in methane emissions across sediment-deposited islands. This study will help us to evaluate the global warming effects of hydropower systems.



338    **Data availability**

339    The data presented here can be obtained upon request to Wenqing Shi (wqshi@nhri.cn).

340

341    **Author contribution**

342    Qiuwen Chen designed the research; Wenqing Shi, Yuyu Ji and Yuchen Chen performed

343    the research; Cheng Chen and Juhua Yu contributed new reagents/analytic tools;

344    Qiuwen Chen and Wenqing Shi analyzed the data; Jianyun Zhang and Bryce R. Van

345    Dam contributed significant discussions and inputs; Wenqing Shi and Qiuwen Chen

346    wrote the paper with input from all authors.

347    **Competing interests**

348    The authors declare that they have no conflict of interest.

349

350    **Acknowledgements**

351    Funding for this study was provided by the National Nature Science Foundation of

352    China (No. 91547206, 51425902, 51709181 and 51709182).

## References

- Bastviken, D., Tranvik, L. J., Downing, J. A., Crill, P. M., and Enrich-Prast, A.: Freshwater methane emissions offset the continental carbon sink, *Science*, 331, 50-50, 10.1126/science.1196808, 2011.
- Boano, F., Revelli, R., and Ridolfi, L.: Reduction of the hyporheic zone volume due to the stream-aquifer interaction, *Geophys. Res. Lett.*, 35, 2008.
- Bonalumi, M., Anselmetti, F. S., Wüest, A., and Schmid, M.: Modeling of temperature and turbidity in a natural lake and a reservoir connected by pumped-storage operations, *Water Resour. Res.*, 48, 10.1029/2012wr011844, 2012.
- Borrel, G., Jezequel, D., Biderre-Petit, C., Morel-Desrosiers, N., Morel, J. P., Peyret, P., Fonty, G., and Lehours, A. C.: Production and consumption of methane in freshwater lake ecosystems, *Res Microbiol*, 162, 832-847, DOI 10.1016/j.resmic.2011.06.004, 2011.
- Butman, D., and Raymond, P. A.: Significant efflux of carbon dioxide from streams and rivers in the United States, *Nature Geoscience*, 4, 839-842, 2011.
- Butturini, A., Guarch, A., Roman í A., Freixa, A., Amalfitano, S., Fazi, S., and Ejarque, E.: Hydrological conditions control in situ DOM retention and release along a Mediterranean river, *Water research*, 99, 33-45, 2016.
- Cardenas, M. B., and Wilson, J. L.: Exchange across a sediment-water interface with ambient groundwater discharge, *Journal of hydrology*, 346, 69-80, 2007.
- Cardenas, M. B., and Markowski, M. S.: Geoelectrical imaging of hyporheic exchange and mixing of river water and groundwater in a large regulated river, *Environmental*

375 Science & Technology, 45, 1407-1411, 2010.

376 Chamberlain, S. D., Gomez-Casanovas, N., Walter, M. T., Boughton, E. H., Bernacchi,  
377 C. J., DeLucia, E. H., Groffman, P. M., Keel E. W., and Sparks, J. P.: Influence of  
378 transient flooding on methane fluxes from subtropical pastures. Journal of  
379 Geophysical Research: Biogeosciences, 121, 965-977 2016.

380 Chen, H., Yuan, X., Chen, Z., Wu, Y., Liu, X., Zhu, D., Wu, N., Zhu, Q., Peng, C., Li,  
381 W.: Methane emissions from the surface of the Three Gorges Reservoir. Journal of  
382 Geophysical Research: Atmospheres, 116, D21, 2011.

383 DelSontro, T., McGinnis, D. F., Sobek, S., Ostrovsky, I., and Wehrli, B.: Extreme  
384 methane emissions from a Swiss hydropower reservoir: contribution from bubbling  
385 sediments, Environmental Science & Technology, 44, 2419-2425, 2010.

386 DelSontro, T., Kunz, M. J., Kempter, T., Wüest, A., Wehrli, B., and Senn, D. B.: Spatial  
387 heterogeneity of methane ebullition in a large tropical reservoir, Environmental  
388 Science & Technology, 45, 9866-9873, 2011.

389 Duchemin, E., Lucotte, M., and Canuel, R.: Comparison of static chamber and thin  
390 boundary layer equation methods for measuring greenhouse gas emissions from large  
391 water bodies §, Environmental Science & Technology, 33, 350-357, 1999.

392 Dumont, M. G., Murrell, J. C.: Stable isotope probing-linking microbial identity to  
393 function. Nature Reviews Microbiology, 3(6), 499, 2005.

394 Gerecht, K. E., Cardenas, M. B., Guswa, A. J., Sawyer, A. H., Nowinski, J. D., and  
395 Swanson, T. E.: Dynamics of hyporheic flow and heat transport across a bed-to-bank  
396 continuum in a large regulated river, Water Resources Research, 47, 2011.

397 Glatzel, S., Well, R.: Evaluation of septum-capped vials for storage of gas samples  
398 during air transport. *Environmental Monitoring and Assessment*, 136, 307-311, 2008.

399 Hester, E. T., Young, K. I., and Widdowson, M. A.: Mixing of surface and groundwater  
400 induced by riverbed dunes: Implications for hyporheic zone definitions and pollutant  
401 reactions, *Water Resources Research*, 49, 5221-5237, 10.1002/wrcr.20399, 2013.

402 Hu, Y., and Cheng, H.: The urgency of assessing the greenhouse gas budgets of  
403 hydroelectric reservoirs in China, *Nature Climate Change*, 3, 708, 2013.

404 Hucks Sawyer, A., Bayani Cardenas, M., Bomar, A., and Mackey, M.: Impact of dam  
405 operations on hyporheic exchange in the riparian zone of a regulated river, *Hydrol*  
406 *Process*, 23, 2129-2137, 2009.

407 Immerzeel, W., Rutten, M., and Droogers, P.: Spatial downscaling of TRMM  
408 precipitation using vegetative response on the Iberian Peninsula, *Remote Sens*  
409 *Environ*, 113, 362-370, 2009.

410 Klupfel, L., Piepenbrock, A., Kappler, A., and Sander, M.: Humic substances as fully  
411 regenerable electron acceptors in recurrently anoxic environments, *Nat Geosci*, 7,  
412 195-200, 10.1038/NGEO2084, 2014.

413 Li, J. P., Dong, S. K., Liu, S. L., Yang, Z. F., Peng, M. C., and Zhao, C.: Effects of  
414 cascading hydropower dams on the composition, biomass and biological integrity of  
415 phytoplankton assemblages in the middle Lancang-Mekong River, *Ecol Eng*, 60,  
416 316-324, 10.1016/j.ecoleng.2013.07.029, 2013.

417 Ma, K., and Lu, Y.: Regulation of microbial methane production and oxidation by  
418 intermittent drainage in rice field soil, *Fems Microbiol Ecol*, 75, 446-456,

10.1111/j.1574-6941.2010.01018.x, 2011.

Maavara, T., Parsons, C. T., Ridenour, C., Stojanovic, S., Durr, H. H., Powley, H. R.,  
and Van Cappellen, P.: Global phosphorus retention by river damming, P Natl Acad  
Sci USA, 112, 15603-15608, 10.1073/pnas.1511797112, 2015.

Maeck, A., DelSontro, T., McGinnis, D. F., Fischer, H., Flury, S., Schmidt, M., Fietzek,  
P., and Lorke, A.: Sediment trapping by dams creates methane emission hot spots,  
Environmental Science & Technology, 47, 8130-8137, 10.1021/es4003907, 2013.

Marvin-DiPasquale, M., Lutz, M. A., Brigham, M. E., Krabbenhoft, D. P., Aiken, G. R.,  
Orem, W. H., and Hall, B. D.: Mercury cycling in stream ecosystems. 2. Benthic  
methylmercury production and bed sediment-pore water partitioning, Environmental  
Science & Technology, 43, 2726-2732, 2009.

Mekong River Commision. available at: [https://www. mrcmekong.org/mekong-](https://www.mrcmekong.org/mekong-basin/physiography/)  
[basin/physiography/](https://www.mrcmekong.org/mekong-basin/physiography/), 2018

Nazaries, L., Murrell, J. C., Millard, P., Baggs, L., and Singh, B. K.: Methane, microbes  
and models: fundamental understanding of the soil methane cycle for future  
predictions. *Environmental Microbiology*, 15, 2395-2417. 2013.

Naranjo, R. C., Niswonger, R. G., and Davis, C. J.: Mixing effects on nitrogen and  
oxygen concentrations and the relationship to mean residence time in a hyporheic  
zone of a riffle-pool sequence, *Water Resources Research*, 51, 7202-7217,  
10.1002/2014WR016593, 2015.

Philip, J.: Approximate analysis of falling-head lined borehole permeameter, *Water  
Resources Research*, 29, 3763-3768, 1993.

441 Ran, L., Lu, X., Sun, H., Han, J., Li, R., and Zhang, J.: Spatial and seasonal variability  
 442 of organic carbon transport in the Yellow River, China, *Journal of Hydrology*, 498,  
 443 76-88, 2013.

444 Rubol, S., Manzoni, S., Bellin, A., and Porporato, A.: Modeling soil moisture and  
 445 oxygen effects on soil biogeochemical cycles including dissimilatory nitrate  
 446 reduction to ammonium (DNRA), *Advances in water resources*, 62, 106-124, 2013.

447 Schwarz, J. I. K., Eckert, W., Conrad, R.: Response of the methanogenic microbial  
 448 community of a profundal lake sediment (Lake Kinneret, Israel) to algal deposition.  
 449 *Limnol. Oceanogr*, 2008, 53(1), 113-121.

450 Seitzinger, S., Harrison, J., Dumont, E., Beusen, A. H., and Bouwman, A.: Sources and  
 451 delivery of carbon, nitrogen, and phosphorus to the coastal zone: An overview of  
 452 Global Nutrient Export from Watersheds (NEWS) models and their application,  
 453 *Global Biogeochem Cy*, 19, 2005.

454 Shi, W., Pan, G., Chen, Q., Song, L., Zhu, L., and Ji, X.: Hypoxia remediation and  
 455 methane emission manipulation using surface oxygen nanobubbles. *Environmental*  
 456 *Science & Technology*, 52, 8712-8717. 2018

457 Smith, L. K., Lewis, W. M., Chanton, J. P., Cronin, G., and Hamilton, S. K.: Methane  
 458 emissions from the Orinoco River floodplain, Venezuela, *Biogeochemistry*, 51, 113-  
 459 140, 2000.

460 Smith, K. R., Desai, M. A., Rogers, J. V., and Houghton, R. A.: Joint CO<sub>2</sub> and CH<sub>4</sub>  
 461 accountability for global warming, *Proceedings of the National Academy of Sciences*,  
 462 110, E2865-E2874, 2013.

463 Sobek, S., DelSontro, T., Wongfun, N., and Wehrli, B.: Extreme organic carbon burial  
 464 fuels intense methane bubbling in a temperate reservoir, *Geophys Res Lett*, 39, Artn  
 465 L0140110.1029/2011gl050144, 2012.

466 Syvitski, J. P., Vörösmarty, C. J., Kettner, A. J., and Green, P.: Impact of humans on the  
 467 flux of terrestrial sediment to the global coastal ocean, *science*, 308, 376-380, 2005.

468 Thornton, K. W., Kimmel, B. L., and Payne, F. E.: *Reservoir limnology: ecological*  
 469 *perspectives*, John Wiley & Sons, 1990.

470 Toffolon, M., Siviglia, A., and Zolezzi, G.: Thermal wave dynamics in rivers affected  
 471 by hydropeaking, *Water Resources Research*, 46, Artn W08536  
 472 10.1029/2009wr008234, 2010.

473 Tonina, D., and Buffington, J. M.: Effects of stream discharge, alluvial depth and bar  
 474 amplitude on hyporheic flow in pool-riffle channels, *Water Resources Research*, 47,  
 475 2011.

476 Van Dam, B. R., Tobias, C., Holbach, A., Paerl, H. W., Zhu, G. W.: CO<sub>2</sub> limited  
 477 conditions favor cyanobacteria in a hypereutrophic lake: An empirical and theoretical  
 478 stable isotope study, *Limnology and Oceanography*. 2018.  
 479 <https://doi.org/10.1002/lno.10798>

480 Veldkamp, E., Koehler, B., and Corre, M. D.: Indications of nitrogen-limited methane  
 481 uptake in tropical forest soils, *Biogeosciences*, 10, 5367-5379, 2013.

482 Wang, C., Liu, S. L., Zhao, Q. H., Deng, L., and Dong, S. K.: Spatial variation and  
 483 contamination assessment of heavy metals in sediments in the Manwan Reservoir,  
 484 Lancang River, *Ecotox Environ Safe*, 82, 32-39, 10.1016/j.ecoenv.2012.05.006, 2012.

485 Wang, J. M., Murphy, J. G., Geddes, J. A., Winsborough, C. L., Basiliko, N., and  
 486 Thomas, S. C.: Methane fluxes measured by eddy covariance and static chamber  
 487 techniques at a temperate forest in central Ontario, Canada, *Biogeosciences*, 10,  
 488 4371-4382, 2013.

489 Watanabe, T., Kimura, M., and Asakawa, S.: Dynamics of methanogenic archaeal  
 490 communities based on rRNA analysis and their relation to methanogenic activity in  
 491 Japanese paddy field soils, *Soil Biol Biochem*, 39, 2877-2887,  
 492 10.1016/j.soilbio.2007.05.030, 2007.

493 Wilkinson, J., Maeck, A., Alshboul, Z., and Lorke, A.: Continuous seasonal river  
 494 ebullition measurements linked to sediment methane formation, *Environmental*  
 495 *Science & Technology*, 49, 13121-13129, 2015.

496 Wuebbles, D. J., and Hayhoe, K.: Atmospheric methane and global change, *Earth-Sci*  
 497 *Rev*, 57, 177-210, 2002.

498 Yang, L., Lu, F., Wang, X., Duan, X., Song, W., Sun, B., Zhang, Q., and Zhou, Y.:  
 499 Spatial and seasonal variability of diffusive methane emissions from the Three  
 500 Gorges Reservoir, *Journal of Geophysical Research: Biogeosciences*, 118, 471-481,  
 501 2013.

502 Zarnetske, J. P., Haggerty, R., Wondzell, S. M., and Baker, M. A.: Labile dissolved  
 503 organic carbon supply limits hyporheic denitrification, *Journal of Geophysical*  
 504 *Research: Biogeosciences*, 116, 2011a.

505 Zarnetske, J. P., Haggerty, R., Wondzell, S. M., and Baker, M. A.: Labile dissolved  
 506 organic carbon supply limits hyporheic denitrification, *Journal of Geophysical*



507        Research, 116, 10.1029/2011jg001730, 2011b.

508

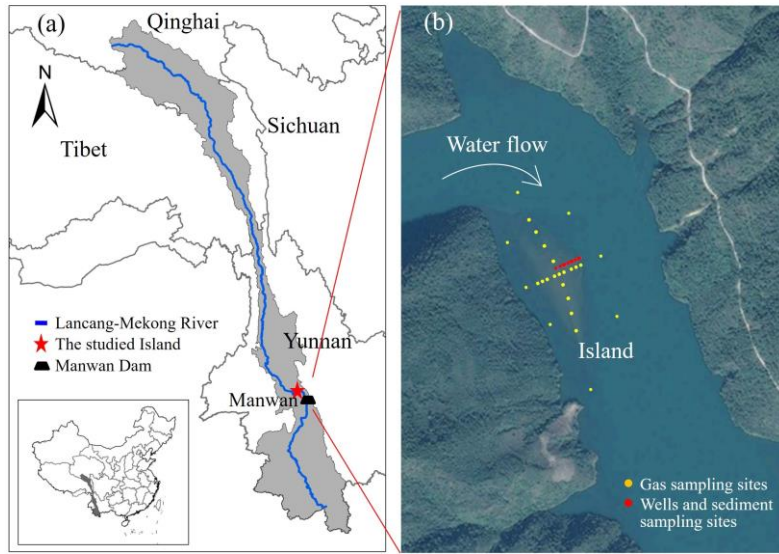

**Fig. 1** Map of the studied island in Manwan reservoir, Lancang-Mekong River. (a) The island site in the river; (b) The monitoring wells, sediment and gas sampling sites on the island.

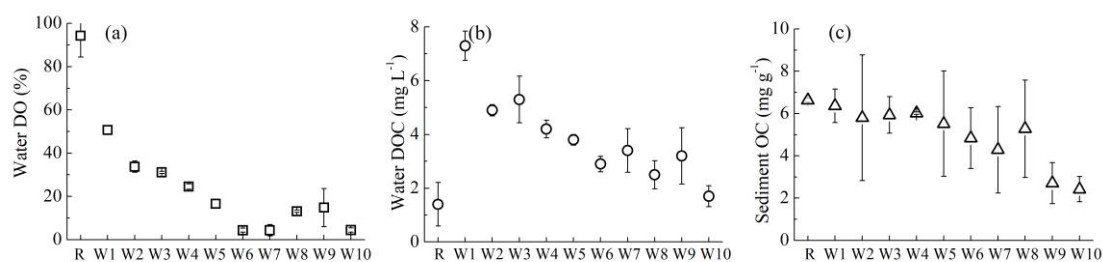

**Fig. 2** Physicochemical properties of the island and reservoir, including water (a) DO, (b) DOC, and (c) sediment OC. DO = dissolved oxygen, DOC = dissolved oxygen carbon, OC = organic carbon, R = reservoir, W = monitoring wells. Error bars indicate standard deviations.

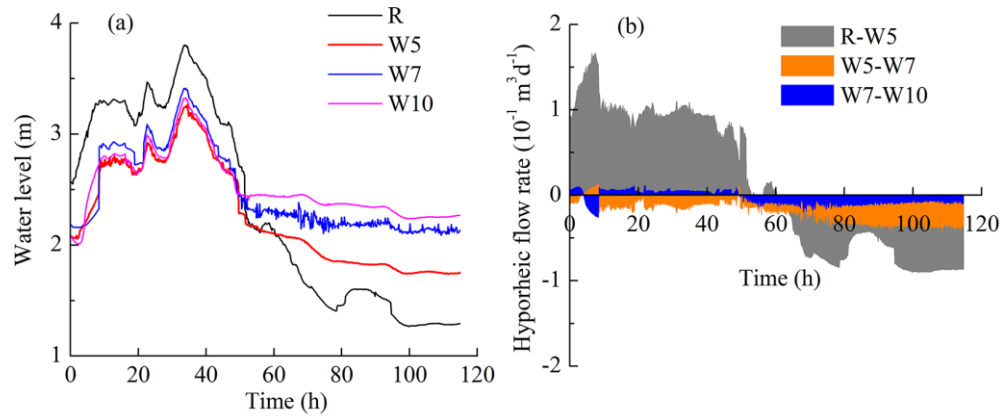

**Fig. 3** Vertical water level fluctuation (a) and horizontal hyporheic flow rate (b). R = reservoir, W = monitoring wells. Positive fluxes indicate net flow from the reservoir to island, whereas negative values indicate net flow from the island to reservoir.

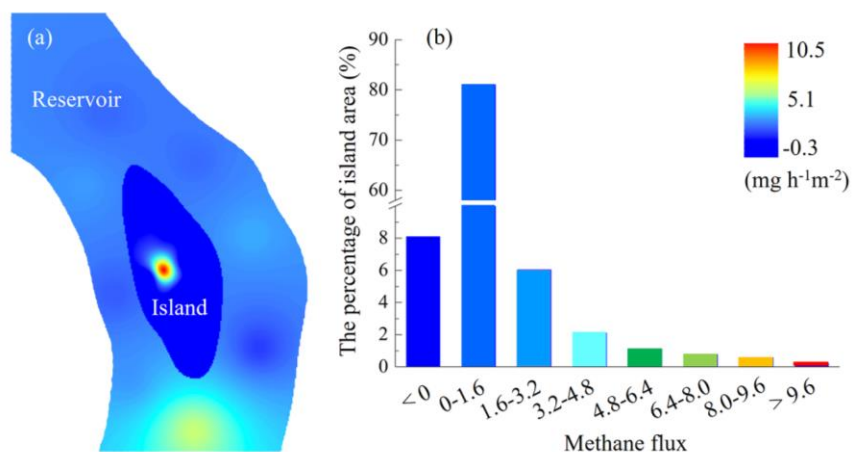

**Fig. 4** Methane emissions from the island and reservoir. (a) Spatial pattern of methane emissions; (b) Percentage of the island area emitting methane at a certain flux. Methane fluxes were interpolated separately for the island and reservoir.

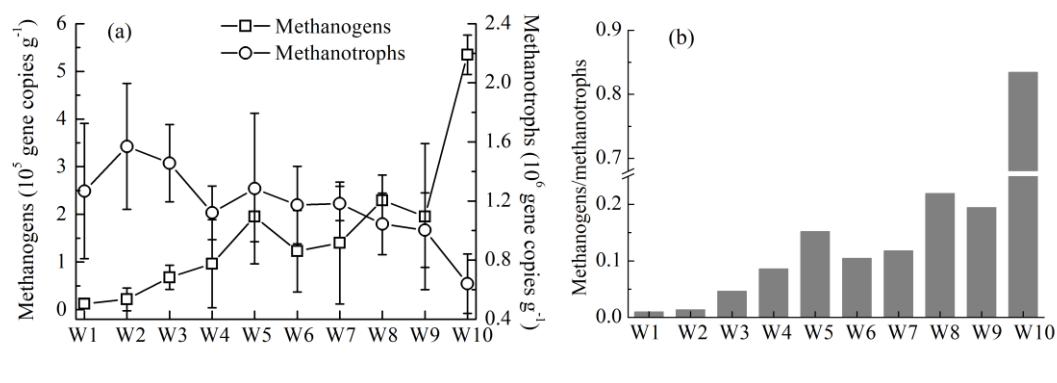

530

531 **Fig. 5** Abundances of sediment methanogens and methanotrophs in the island. (a)  
532 Spatial patterns of methanogen and methanotroph abundances across the island; (b) The  
533 ratio of methanogen to methanotroph abundance at each site. W= monitoring wells.  
534 Error bars indicate standard deviations.

535

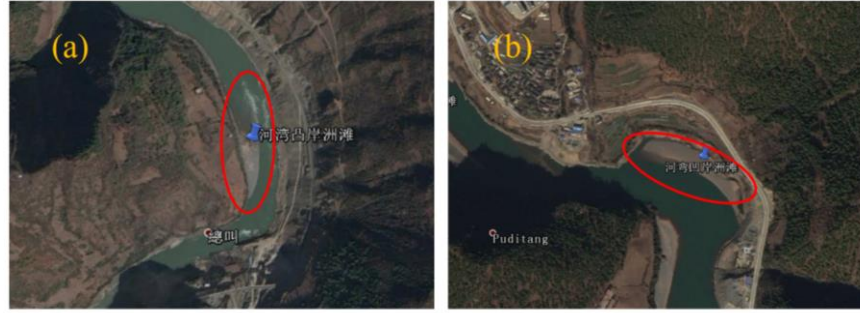

**Fig. S1** The river impoundment formed islands in the Lancang-Mekong River. There were about 33 sediment-deposited islands, of which 81.8% are located at the convex bank (a), and 18.2% at the concave bank (b).

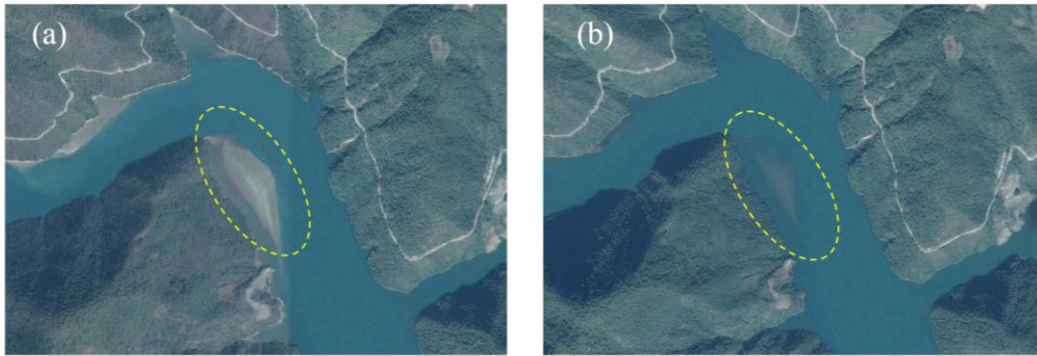

**Fig. S2** Island image before (a) and after (b) flooding under reservoir operation.



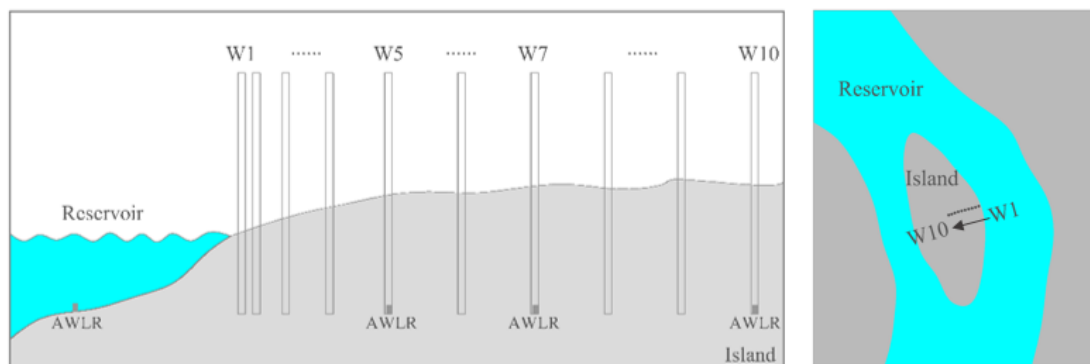

**Fig. S3** Monitoring wells established from the island edge to the center. Sediment samples were collected adjacent to each well.

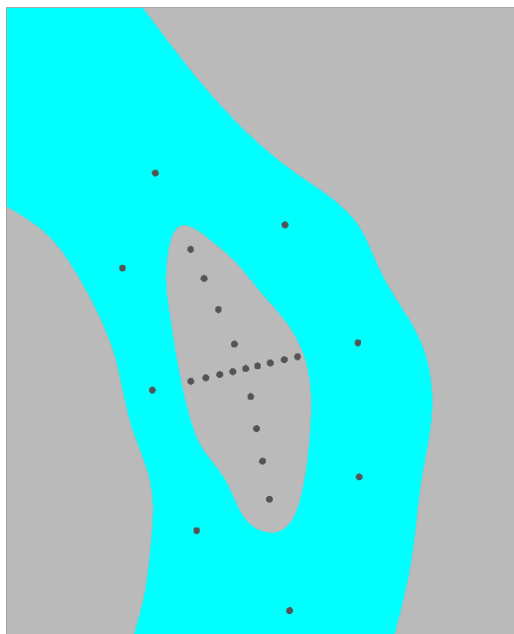

**Fig. S4** Sampling sites for methane flux analyses in the island and reservoir, including eight sites in the reservoir and seventeen sites on the island.

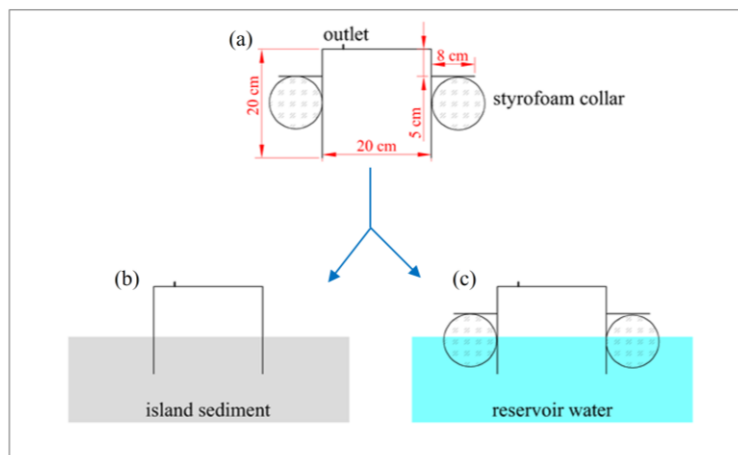

**Fig. S5** Bifunctional static chambers (a) for methane flux analyses across the sediment-air interface in the island (b) and water-air interface in the reservoir (c). Styrofoam collar was removable.

Table S1 The data about methane fluxes at each sampling site

| Sites |       | The concentration in the chamber ( $\times 10^{-6}$ mol/L) |        |        |        |        | Flux                      | Flux                             | Flux          | Average flux  |
|-------|-------|------------------------------------------------------------|--------|--------|--------|--------|---------------------------|----------------------------------|---------------|---------------|
|       |       | 0 min                                                      | 10 min | 20 min | 30 min | 40 min | ( $\times 10^{-6}$ mol/h) | ( $\times 10^{-6}$ mol/h $m^2$ ) | (mg/h $m^2$ ) | (mg/h $m^2$ ) |
| R1    | Rep-1 | 0.452                                                      | 0.773  | 1.174  | 1.375  | 1.656  | 1.806                     | 57.5                             | 0.92          | 1.07          |
|       | Rep-2 | 0.641                                                      | 0.921  | 1.280  | 1.680  | 2.160  | 2.279                     | 72.6                             | 1.16          |               |
|       | Rep-3 | 0.541                                                      | 1.106  | 1.272  | 1.637  | 2.103  | 2.193                     | 69.8                             | 1.12          |               |
| R2    | Rep-1 | 0.797                                                      | 0.887  | 1.232  | 1.778  | 2.081  | 2.075                     | 66.1                             | 1.06          | 1.13          |
|       | Rep-2 | 1.166                                                      | 1.431  | 1.722  | 2.112  | 2.778  | 2.343                     | 74.6                             | 1.19          |               |
|       | Rep-3 | 0.823                                                      | 0.869  | 1.197  | 3.825  | 4.273  | NA                        | NA                               | NA            |               |
| R3    | Rep-1 | 0.678                                                      | 1.075  | 1.809  | 2.243  | 3.264  | 3.804                     | 121.1                            | 1.94          | 2.10          |
|       | Rep-2 | 0.822                                                      | 1.261  | 2.282  | 2.702  | 3.704  | 4.323                     | 137.7                            | 2.20          |               |
|       | Rep-3 | 1.243                                                      | 1.543  | 2.246  | 2.969  | 4.043  | 4.216                     | 134.3                            | 2.15          |               |
| R4    | Rep-1 | 0.573                                                      | 0.660  | 0.759  | 1.018  | 1.189  | 0.954                     | 30.4                             | 0.49          | 0.39          |
|       | Rep-2 | 0.390                                                      | 0.553  | 0.665  | 0.797  | 0.829  | 0.673                     | 21.4                             | 0.34          |               |
|       | Rep-3 | 0.476                                                      | 0.622  | 0.762  | 0.863  | 0.909  | 0.665                     | 21.2                             | 0.34          |               |
| R5    | Rep-1 | 1.867                                                      | 2.871  | 4.802  | 6.432  | 8.739  | 10.383                    | 330.7                            | 5.29          | 5.47          |
|       | Rep-2 | 1.294                                                      | 2.554  | 4.565  | 6.582  | 9.349  | 12.082                    | 384.8                            | 6.16          |               |
|       | Rep-3 | 1.188                                                      | 2.165  | 4.289  | 4.913  | 7.935  | 9.745                     | 310.4                            | 4.97          |               |
| R6    | Rep-1 | 0.493                                                      | 1.175  | 1.608  | 2.142  | 2.678  | 3.203                     | 102.0                            | 1.63          | 1.84          |
|       | Rep-2 | 0.881                                                      | 1.411  | 1.881  | 2.751  | 3.561  | 4.021                     | 128.1                            | 2.05          |               |
|       | Rep-3 | 0.677                                                      | 1.432  | 1.381  | 2.988  | 3.463  | NA                        | NA                               | NA            |               |
| R7    | Rep-1 | 0.388                                                      | 0.802  | 0.923  | 1.224  | 1.482  | 1.566                     | 49.9                             | 0.80          | 0.84          |
|       | Rep-2 | 0.653                                                      | 0.876  | 1.875  | 1.896  | 2.165  | NA                        | NA                               | NA            |               |
|       | Rep-3 | 0.794                                                      | 0.930  | 1.420  | 1.609  | 1.902  | 1.737                     | 55.3                             | 0.89          |               |
| R8    | Rep-1 | 0.971                                                      | 1.626  | 2.515  | 3.401  | 4.015  | 4.718                     | 150.3                            | 2.40          | 1.84          |
|       | Rep-2 | 0.879                                                      | 0.997  | 1.377  | 1.995  | 2.469  | 2.508                     | 79.9                             | 1.28          |               |
|       | Rep-3 | 0.726                                                      | 0.726  | 1.543  | 1.945  | 2.807  | 3.605                     | 114.8                            | 1.84          |               |
| 1     | Rep-1 | 0.463                                                      | 0.434  | 0.358  | 0.295  | 0.200  | -0.399                    | -12.7                            | -0.20         | -0.21         |
|       | Rep-2 | 0.454                                                      | 0.414  | 0.358  | 0.255  | 0.157  | -0.452                    | -14.4                            | -0.23         |               |
|       | Rep-3 | 0.386                                                      | 0.314  | 0.258  | 0.214  | 0.139  | -0.356                    | -11.3                            | -0.18         |               |
| 2     | Rep-1 | 0.878                                                      | 1.213  | 1.556  | 2.009  | 2.810  | 2.796                     | 89.0                             | 1.42          | 1.26          |
|       | Rep-2 | 0.784                                                      | 0.970  | 1.432  | 1.945  | 2.442  | 2.575                     | 82.0                             | 1.31          |               |
|       | Rep-3 | 0.993                                                      | 1.187  | 1.534  | 1.898  | 2.358  | 2.065                     | 65.8                             | 1.05          |               |
| 3     | Rep-1 | 1.068                                                      | 1.483  | 2.425  | 3.567  | 4.738  | 5.654                     | 180.1                            | 2.88          | 2.78          |
|       | Rep-2 | 1.282                                                      | 1.919  | 2.799  | 3.304  | 4.482  | 4.671                     | 148.8                            | 2.38          |               |
|       | Rep-3 | 1.482                                                      | 1.949  | 2.876  | 3.967  | 5.519  | 6.055                     | 192.8                            | 3.09          |               |
| 4     | Rep-1 | 2.893                                                      | 6.897  | 8.251  | 12.608 | 16.811 | 20.13                     | 641.1                            | 10.26         | 10.41         |
|       | Rep-2 | 3.892                                                      | 7.996  | 10.451 | 15.906 | 17.211 | 20.73                     | 660.2                            | 10.56         |               |
|       | Rep-3 | 1.278                                                      | 2.301  | 4.061  | 5.868  | 8.291  | NA                        | NA                               | NA            |               |
| 5     | Rep-1 | 0.786                                                      | NA     | 2.784  | 4.324  | NA     | NA                        | NA                               | NA            | 4.27          |
|       | Rep-2 | 0.876                                                      | 1.805  | 3.180  | 4.625  | 5.769  | 7.564                     | 240.9                            | 3.85          |               |
|       | Rep-3 | 1.069                                                      | 2.075  | 3.208  | 5.141  | 7.203  | 9.201                     | 293.0                            | 4.69          |               |
| 6     | Rep-1 | 1.221                                                      | 1.519  | 1.697  | 1.875  | 1.933  | 1.068                     | 34.0                             | 0.54          | 0.49          |

|    |       |       |        |        |        |        |        |       |       |       |
|----|-------|-------|--------|--------|--------|--------|--------|-------|-------|-------|
|    | Rep-2 | 0.782 | 0.819  | 0.999  | 1.153  | 1.338  | 0.868  | 27.6  | 0.44  |       |
|    | Rep-3 | 1.887 | 1.267  | 1.756  | 2.154  | 2.375  | NA     | NA    | NA    |       |
| 7  | Rep-1 | 0.456 | 0.476  | 0.481  | 0.493  | 0.507  | 0.071  | 2.3   | 0.04  | 0.03  |
|    | Rep-2 | 0.479 | 0.489  | 0.499  | 0.505  | 0.515  | 0.05   | 1.6   | 0.03  |       |
|    | Rep-3 | 0.578 | 0.587  | 0.602  | 0.611  | 0.62   | 0.065  | 2.1   | 0.03  |       |
| 8  | Rep-1 | 0.399 | 0.408  | 0.417  | 0.422  | 0.428  | 0.043  | 1.4   | 0.02  | 0.03  |
|    | Rep-2 | 0.456 | 0.471  | 0.482  | 0.503  | 0.512  | 0.086  | 2.7   | 0.04  |       |
|    | Rep-3 | 0.488 | 0.497  | 0.505  | 0.517  | 0.519  | 0.049  | 1.6   | 0.02  |       |
| 9  | Rep-1 | 0.678 | 0.6768 | 0.676  | 0.675  | 0.6745 | -0.005 | -0.2  | 0.00  | -0.01 |
|    | Rep-2 | 0.544 | 0.536  | 0.531  | 0.528  | 0.521  | -0.032 | -1.0  | -0.02 |       |
|    | Rep-3 | 0.487 | 0.483  | 0.48   | 0.475  | 0.472  | -0.023 | -0.7  | -0.01 |       |
| 10 | Rep-1 | 0.661 | 0.67   | 0.678  | 0.683  | 0.687  | 0.039  | 1.2   | 0.02  | 0.02  |
|    | Rep-2 | 0.495 | 0.502  | 0.506  | 0.512  | 0.519  | 0.035  | 1.1   | 0.02  |       |
|    | Rep-3 | 0.785 | 0.791  | 0.795  | 0.802  | 0.809  | 0.0355 | 1.1   | 0.02  |       |
| 11 | Rep-1 | 0.555 | 0.5545 | 0.5538 | 0.5535 | 0.5528 | -0.003 | -0.1  | 0.00  | 0.00  |
|    | Rep-2 | 0.453 | 0.454  | 0.454  | 0.455  | 0.456  | 0.004  | 0.1   | 0.00  |       |
|    | Rep-3 | 0.768 | 0.745  | 0.755  | 0.777  | 0.815  | NA     | NA    | NA    |       |
| 12 | Rep-1 | 0.787 | 1.199  | 1.443  | 2.108  | 2.588  | 2.707  | 86.2  | 1.38  | 1.12  |
|    | Rep-2 | 0.722 | 0.805  | 1.119  | 1.403  | 1.844  | 1.705  | 54.3  | 0.87  |       |
|    | Rep-3 | 0.477 | 0.674  | 0.846  | 0.876  | 1.532  | NA     | NA    | NA    |       |
| 13 | Rep-1 | 0.491 | 1.118  | 1.694  | 2.171  | 2.847  | 3.46   | 110.2 | 1.76  | 1.61  |
|    | Rep-2 | 0.493 | 1.015  | 1.290  | 1.965  | 2.390  | 2.85   | 90.8  | 1.45  |       |
|    | Rep-3 | NA    | 0.564  | NA     | 0.762  | 1.438  | NA     | NA    | NA    |       |
| 14 | Rep-1 | 0.393 | 0.444  | 0.477  | 0.521  | 0.532  | 0.021  | 0.7   | 0.01  | 0.01  |
|    | Rep-2 | 0.420 | 0.425  | 0.430  | NA     | 0.439  | 0.029  | 0.9   | 0.01  |       |
|    | Rep-3 | 0.422 | 0.427  | 0.432  | 0.435  | 0.440  | 0.0265 | 0.8   | 0.01  |       |
| 15 | Rep-1 | 0.754 | 0.733  | 0.695  | 0.677  | 0.644  | -0.166 | -5.3  | -0.08 | -0.05 |
|    | Rep-2 | 0.472 | 0.463  | 0.455  | 0.447  | 0.435  | -0.054 | -1.7  | -0.03 |       |
|    | Rep-3 | 0.511 | 0.493  | 0.475  | 0.457  | 0.447  | -0.098 | -3.1  | -0.05 |       |
| 16 | Rep-1 | 0.567 | 0.540  | 0.525  | 0.511  | 0.503  | -0.094 | -3.0  | -0.05 | -0.04 |
|    | Rep-2 | 0.853 | 0.840  | 0.835  | 0.821  | 0.809  | -0.064 | -2.0  | -0.03 |       |
|    | Rep-3 | 0.454 | 0.440  | 0.435  | 0.411  | 0.398  | -0.085 | -2.7  | -0.04 |       |
| 17 | Rep-1 | 0.263 | 0.564  | 0.672  | 0.675  | 0.785  | NA     | NA    | NA    | 0.01  |
|    | Rep-2 | 0.567 | 0.570  | 0.572  | 0.574  | 0.575  | 0.012  | 0.4   | 0.01  |       |
|    | Rep-3 | 0.368 | 0.370  | 0.375  | 0.377  | 0.381  | 0.02   | 0.6   | 0.01  |       |
